# Supplementary material for: Mapping the Field in Stress, Anxiety, and Postpartum Depression in Mothers of Preterm Infants in Neonatal Intensive Care
Source: MDPI journal article supplement (doi:10.3390/children8090730), 2021-08-25
Supplement: s1 [file s1]

## Supplementary Materials

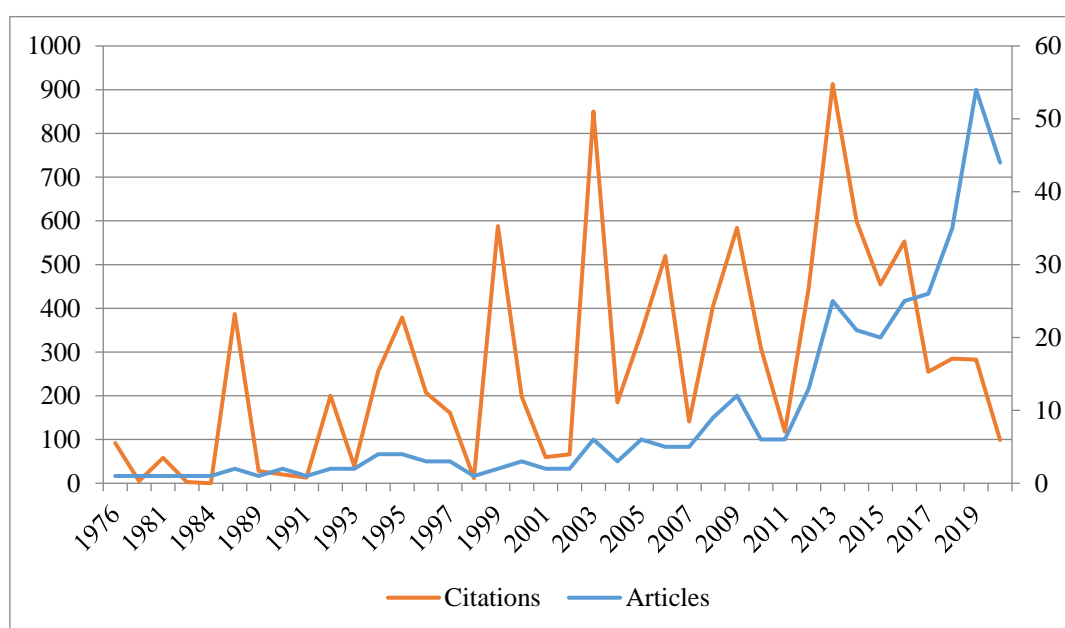

**Figure S1.** Evolution of published articles and citations from 1976 to 2020. Source: own elaboration based on Scopus 2020.

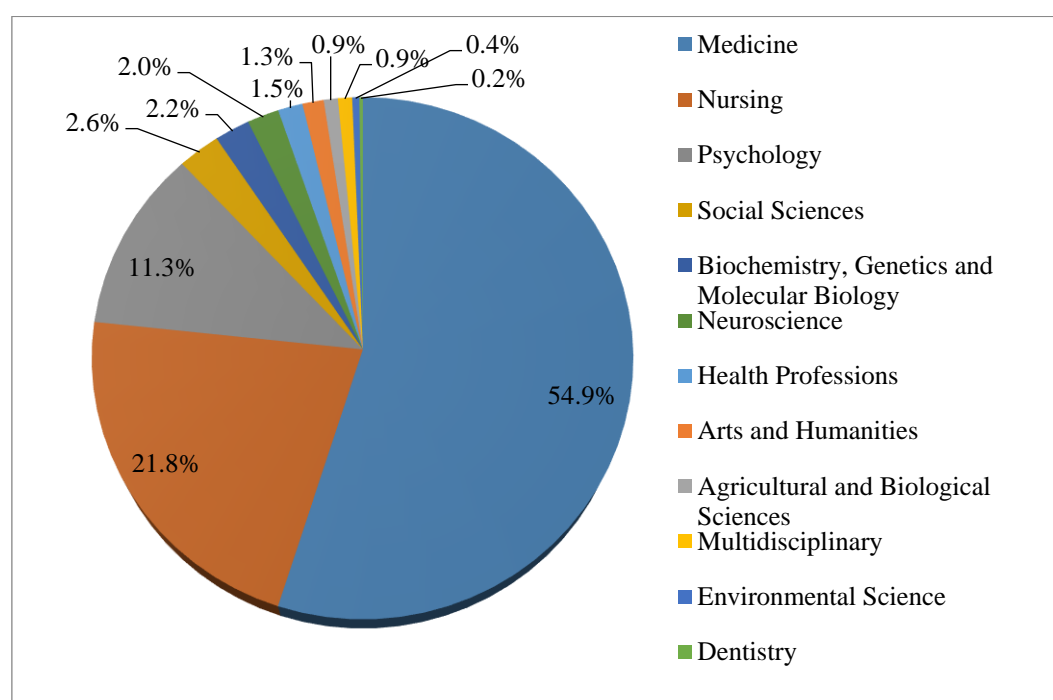

**Figure S2.** Subject areas that stand out on stress, anxiety and PPD in mothers of preterm infants in NICU 1976 to 2020. Source: own elaboration based on Scopus 2020.

**Table S1.** The 10 most productive journals in the research on stress, anxiety and postpartum depression in mothers of preterm infants in NICU from 1976 to 2020.

| Journal                                               | A  | COU           | C   | C/A   | 1st A | Last A | C/Y   | h-index |
|-------------------------------------------------------|----|---------------|-----|-------|-------|--------|-------|---------|
| Advances In Neonatal Care                             | 17 | United States | 318 | 18,71 | 2005  | 2020   | 21.2  | 10      |
| Early Human Development                               | 17 | Netherlands   | 617 | 36,29 | 2003  | 2020   | 36.29 | 11      |
| Journal Of Perinatology                               | 10 | United States | 533 | 53,30 | 1996  | 2018   | 24.22 | 9       |
| Acta Paediatrica International Journal Of Paediatrics | 9  | Denmark       | 300 | 33,33 | 2008  | 2020   | 25    | 6       |

|                                                                |   |                |       |       |      |      |       |   |
|----------------------------------------------------------------|---|----------------|-------|-------|------|------|-------|---|
| Journal Of Clinical Nursing                                    | 9 | United kingdom | 225   | 25,00 | 2006 | 2019 | 17.30 | 7 |
| Pediatrics                                                     | 8 | United States  | 1,145 | 143,1 | 1986 | 2019 | 34.69 | 7 |
| BMC Pediatrics                                                 | 7 | United States  | 113   | 16,14 | 2012 | 2020 | 14.12 | 5 |
| JOGNN Journal Of Obstetric<br>Gynecologic And Neonatal Nursing | 6 | United States  | 75    | 12,50 | 2010 | 2017 | 10.71 | 4 |
| Journal Of Maternal Fetal And<br>Neonatal Medicine             | 6 | United kingdom | 129   | 21,50 | 2014 | 2020 | 21.15 | 4 |
| Journal Of Perinatal And Neonatal<br>Nursing                   | 6 | United States  | 46    | 7,67  | 2014 | 2019 | 9.2   | 3 |

A: Number of total articles; COU: Countries; C: Number of citations for all articles; C/A: Average citation per article; 1st A: Year of first published article; Last A: Year of last published article; C/Y: Average number of citations per year since the 1st A. Source: own elaboration based on Scopus 2020.

**Table S2.** The top 10 most productive authors on stress, anxiety and PPD in mothers of preterm infants in NICU from 1976 to 2020.

| Author             | A | C   | C/A    | 1st A | Last A | h-Index | Country        | Affiliation                                 |
|--------------------|---|-----|--------|-------|--------|---------|----------------|---------------------------------------------|
| Holditch-Davis, D. | 9 | 634 | 70,44  | 1994  | 2020   | 7       | Unitted States | Duke University, Durham                     |
| Miles, M.S.        | 7 | 824 | 117,71 | 1992  | 2009   | 7       | Unitted States | University of North Carolina at Chapel Hill |
| Flacking, R.       | 6 | 97  | 16,17  | 2013  | 2019   | 5       | Norway         | Oslo University Hospital                    |
| Montirosso, R.     | 6 | 226 | 37,67  | 2012  | 2018   | 6       | Italy          | Scientific Institute IRCCS Eugenio Medea    |
| Shaw, R.J.         | 6 | 398 | 66,33  | 2009  | 2014   | 6       | Unitted States | Stanford University                         |
| Borgatti, R.       | 5 | 134 | 26,80  | 2012  | 2018   | 5       | Italy          | Scientific Institute IRCCS Eugenio Medea    |
| Horwitz, S.M.      | 5 | 224 | 44,80  | 2011  | 2014   | 5       | Unitted States | University of New Mexico                    |
| Martinez, F.E.     | 5 | 111 | 22,20  | 2004  | 2016   | 5       | Brazil         | Universidade de São Paulo                   |
| Mörelus, E.        | 5 | 198 | 39,60  | 2005  | 2018   | 5       | Sweden         | Linköping University                        |
| Anderson, P.J.     | 4 | 247 | 61,75  | 2010  | 2019   | 3       | Australia      | <u>Monash University</u> , Melbourne        |

A: Number of total articles; C: Number of citations for all articles; C/A: Average citation per article; 1st A: Year of first published article; Last A: Year of last published article. Source: own elaboration based on Scopus 2020.

**Table S3.** The top 5 most cited articles from 1976 to 2020.

| Title                                                                                                                                                                                             | Author/s                                                                                                 | Journal                                     | Year | C   | C/Y  |
|---------------------------------------------------------------------------------------------------------------------------------------------------------------------------------------------------|----------------------------------------------------------------------------------------------------------|---------------------------------------------|------|-----|------|
|                                                                                                                                                                                                   | Singer L.T. Salvator A.                                                                                  |                                             |      |     |      |
| Maternal psychological distress and parenting stress after the birth of a very low-birth-weight infant                                                                                            | Guo S.<br>Collin M.<br>Lilien L.<br>Baley J.                                                             | Journal of the American Medical Association | 1999 | 528 | 25,1 |
| Individualized behavioral and environmental care for the very low birth weight preterm infant at high risk for bronchopulmonary dysplasia: Neonatal intensive care unit and developmental outcome | Als H.<br>Lawhon G.<br>Brown E.<br>Gibes R.<br>Duffy F.H.<br>McAnulty G.<br>Blickman J.G.<br>Melnik B.M. | Pediatrics                                  | 1986 | 376 | 11,1 |
| Reducing premature infants' length of stay and improving parents' mental health outcomes with the Creating Opportunities for Parent Empowerment (COPE) Neonatal                                   | Feinstein N.F. Alpert-Gillis L. Fairbanks E.<br>Crean H.F.<br>Sinkin R.A.<br>Stone P.W.                  | Pediatrics                                  | 2006 | 375 | 26,8 |

|                                                                           |                                                             |                                                         |      |     |      |
|---------------------------------------------------------------------------|-------------------------------------------------------------|---------------------------------------------------------|------|-----|------|
| Intensive Care Unit Program: A randomized, controlled trial               | Small L.<br>Tu X.<br>Gross S.J.                             |                                                         |      |     |      |
| The impact of very premature birth on the psychological health of mothers | Davis L., Edwards H., Mohay H., Wollin J.                   | Early Human Development                                 | 2003 | 262 | 15,4 |
| Posttraumatic stress symptoms in mothers of premature infants.            | Holditch-Davis D., Bartlett T.R., Blickman A.L., Miles M.S. | Journal of obstetric, gynecologic, and neonatal nursing | 2003 | 226 | 13,3 |

C: Total number of citations; C/Y: Average number of citations per year. Source: own elaboration based on Scopus 2020.

**Table S4.** The characteristics of the strategic diagram topics from 1976 to 2002.

| Topics                | Documents | h-Index | Citations | Centrality | Density |
|-----------------------|-----------|---------|-----------|------------|---------|
| HUMAN                 | 34        | 20      | 2,435     | 1          | 1       |
| ADULT                 | 26        | 16      | 1,694     | 0.92       | 0.92    |
| INFANT                | 5         | 5       | 1,046     | 0.58       | 0.83    |
| ATTITUDE-TO-HEALTH    | 8         | 7       | 514       | 0.75       | 0.58    |
| MOTHER-CHILD-RELATION | 8         | 8       | 339       | 0.5        | 0.67    |
| PARENTS               | 9         | 7       | 391       | 0.67       | 0.33    |
| ADOLESCENT            | 7         | 7       | 449       | 0.83       | 0.17    |
| VERY-LOW-BIRTHWEIGHT  | 3         | 3       | 899       | 0.25       | 0.25    |
| CHILD-CARE            | 2         | 1       | 11        | 0.42       | 0.75    |
| PREGNANCY             | 4         | 4       | 177       | 0.33       | 0.42    |
| INTERVIEW             | 3         | 3       | 689       | 0.08       | 0.5     |
| GESTATIONAL-AGE       | 4         | 4       | 345       | 0.17       | 0.08    |

Source: own elaboration based on data from Scopus (2020), generated using SciMAT.

**Table S5.** The characteristics of the strategic diagram topics from 2003 to 2011.

| Topics                      | Documents | h-Index | Citations | Centrality | Density |
|-----------------------------|-----------|---------|-----------|------------|---------|
| FEMALE                      | 52        | 29      | 2,936     | 1          | 1       |
| RANDOMISED-CONTROLLED-TRIAL | 10        | 10      | 972       | 0.73       | 0.93    |
| CHILD-PARENT-RELATION       | 13        | 12      | 1,186     | 0.87       | 0.73    |
| HOSPITALIZATION             | 13        | 10      | 843       | 0.67       | 0.8     |
| CHILD-BEHAVIOR              | 8         | 7       | 426       | 0.53       | 0.87    |
| INTENSIVE-CARE,-NEONATAL    | 22        | 17      | 1,145     | 0.93       | 0.6     |
| YOUNG-ADULT                 | 10        | 8       | 444       | 0.6        | 0.53    |
| SOCIAL-SUPPORT              | 9         | 9       | 666       | 0.2        | 0.33    |
| PRIORITY-JOURNAL            | 14        | 11      | 731       | 0.47       | 0.2     |
| PREMATURE-INFANT            | 7         | 5       | 715       | 0.4        | 0.4     |
| PSYCHOLOGICAL-ASPECT        | 20        | 16      | 1,208     | 0.8        | 0.27    |
| ANXIETY                     | 15        | 13      | 952       | 0.33       | 0.07    |
| QUESTIONNAIRE               | 8         | 7       | 654       | 0.27       | 0.47    |
| NURSING                     | 3         | 3       | 176       | 0.13       | 0.67    |
| PREGNANCY                   | 3         | 2       | 3         | 0.07       | 0.13    |

Source: own elaboration based on data from Scopus (2020), generated using SciMAT.

**Table S6.** The characteristics of the strategic diagram topics from 2012 to 2020.

| Topics                   | Documents | h-Index | Citations | Centrality | Density |
|--------------------------|-----------|---------|-----------|------------|---------|
| HUMANS                   | 232       | 32      | 3,531     | 1          | 1       |
| PROSPECTIVE-STUDIES      | 12        | 6       | 236       | 0.58       | 0.92    |
| PREGNANCY-OUTCOMES       | 7         | 3       | 91        | 0.33       | 0.83    |
| FATHERS                  | 24        | 13      | 425       | 0.83       | 0.75    |
| BEHAVIOUR                | 8         | 6       | 140       | 0.42       | 0.67    |
| VERY-LOW-BIRTHWEIGHT     | 13        | 9       | 200       | 0.75       | 0.58    |
| PSYCHOLOGICAL-WELL-BEING | 19        | 9       | 271       | 0.92       | 0.5     |
| PRETERM-BIRTHS           | 11        | 5       | 156       | 0.67       | 0.42    |
|                          | 3         |         |           |            |         |

|                     |    |   |     |      |      |
|---------------------|----|---|-----|------|------|
| VITAL-SIGNS         | 1  | 1 | 5   | 0.17 | 0.33 |
| ATTITUDES           | 2  | 1 | 14  | 0.25 | 0.25 |
| MOBILE-APPLICATIONS | 1  | 1 | 9   | 0.08 | 0.17 |
| PRETERM-INFANTS     | 13 | 6 | 215 | 0.5  | 0.08 |

---

Source: own elaboration based on data from Scopus (2020), generated using SciMAT.
